# Supplementary material
Source: PubMed Central journal article supplement (PMC6249607)
Supplement: jiy367_suppl_supplementary_figure.pdf [file jiy367_suppl_supplementary_figure.pdf]

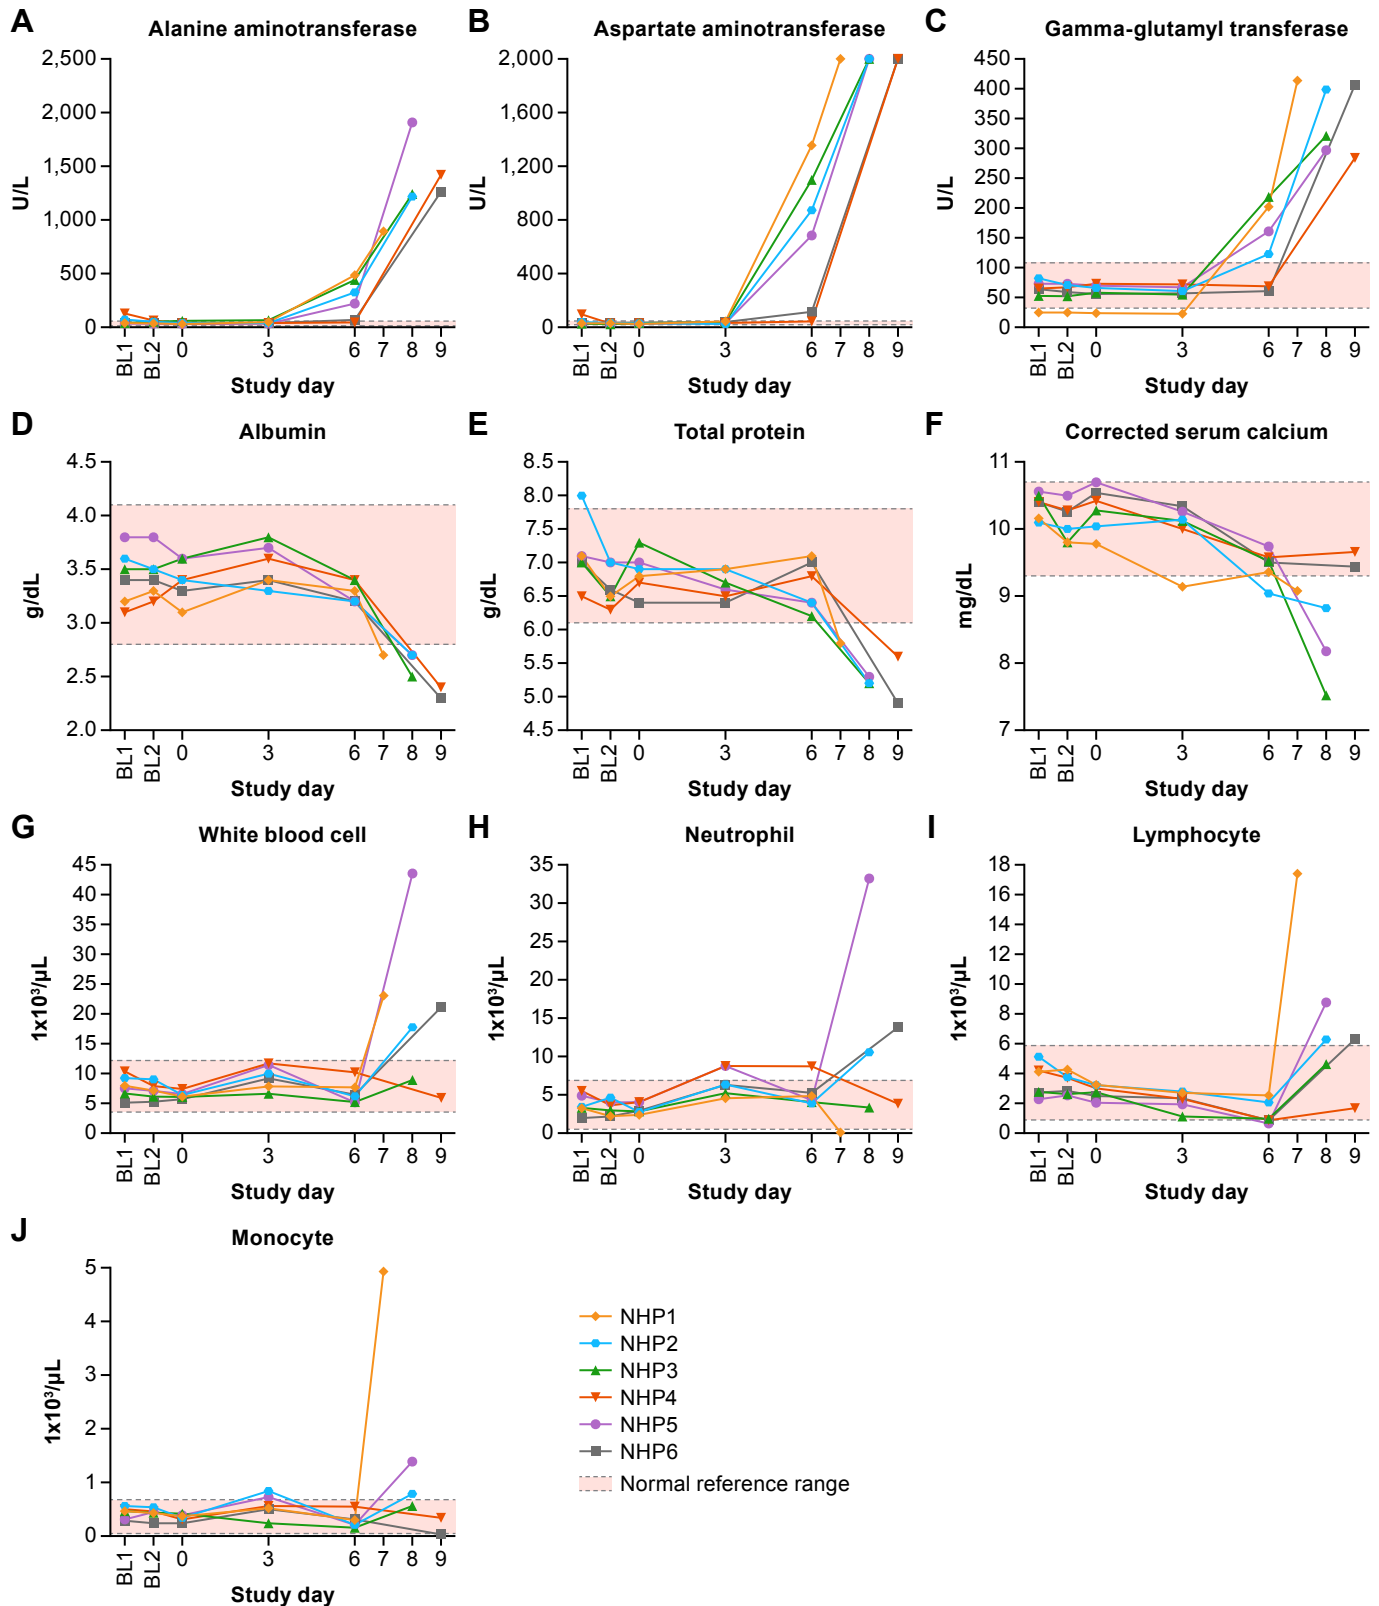

**Supplemental figure 1.** Relevant serum chemistry and blood cell counts for MARV infected rhesus macaques. X-axis is post-infection day; B1 and B2 are baseline values collected two weeks and one week pre-infection, respectively. Serum calcium is corrected for hypoproteinemia by the formula (measured serum calcium – (0.4 x total protein) + 3.3) [1].

**Reference:**

1. Ferguson DC, Hoenig M. Endocrine System. In: Latimer KS, Mahaffey EA, Prasse KW, eds. Duncan and Prasse's Veterinary Laboratory Medicine: clinical pathology. Fourth ed. Ames, IA: Iowa State Press, 2003:270-303.

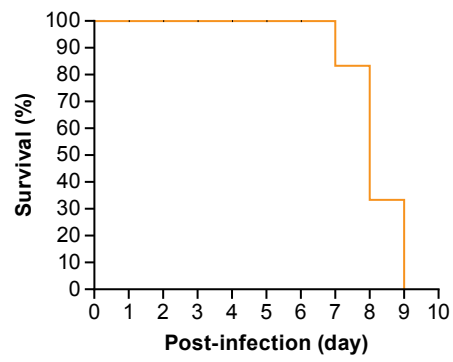

**Supplemental figure 2.** Survival curve for MARV infected rhesus macaques.

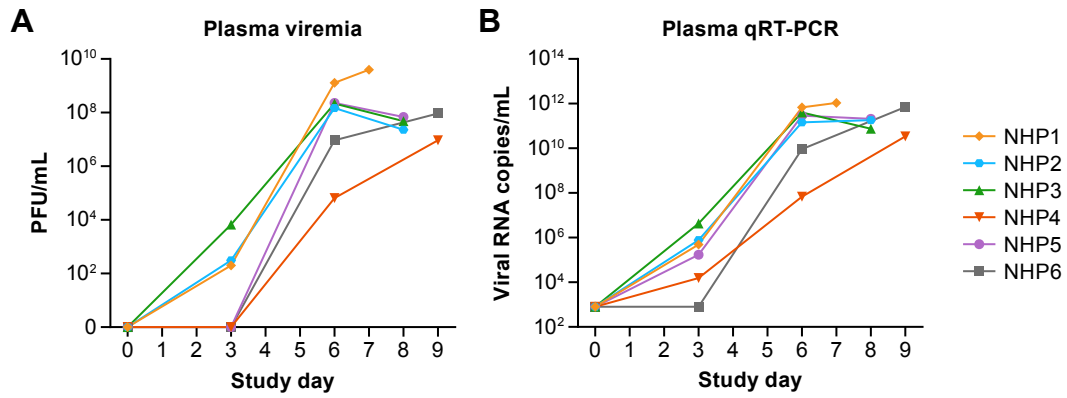

**Supplemental figure 3.** Development of viremia in MARV infected rhesus macaques. Development of viremia was charted using the Avicel plaque assay and by qRT-PCR using the BEI Resources Critical Reagents Program (CRP) MARV Angola qRT-PCR kit.
